# Supplementary material for: Phase inversion-based nanoemulsions of medium chain triglyceride as potential drug delivery system for parenteral applications
Source: publisher site journal article supplement (doi:10.3762/bjnano.11.16), 2020-01-17
Supplement: Additional file 1 [file 2190-4286-11-16-S1.pdf]

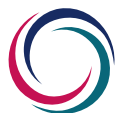

## Supporting Information

for

### **Phase inversion-based nanoemulsions of medium chain triglyceride as potential drug delivery system for parenteral applications**

Eike Folker Busmann, Dailén García Martínez, Henrike Lucas and Karsten Mäder

*Beilstein J. Nanotechnol.* **2020**, *11*, 213–224. [doi:10.3762/bjnano.11.16](https://doi.org/10.3762/bjnano.11.16)

## Additional figures

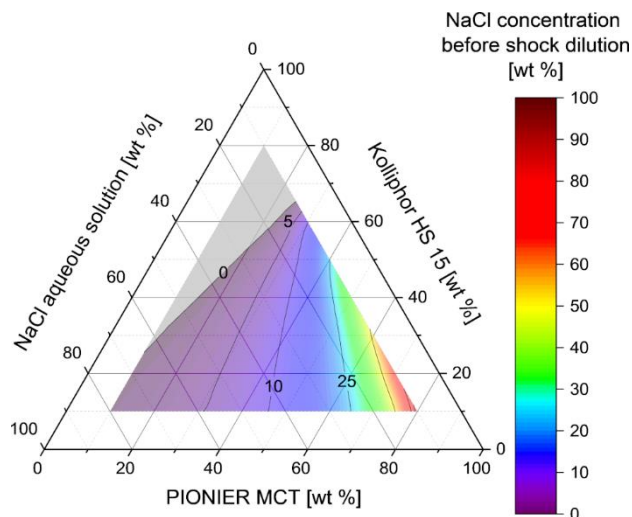

**Figure S1:** Ternary phase diagram showing the calculated sodium chloride concentration of the aqueous phase for the production of isotonic nanoemulsions according to Equation 10. The grey area resembles solutions for which the calculated salt concentration was negative.

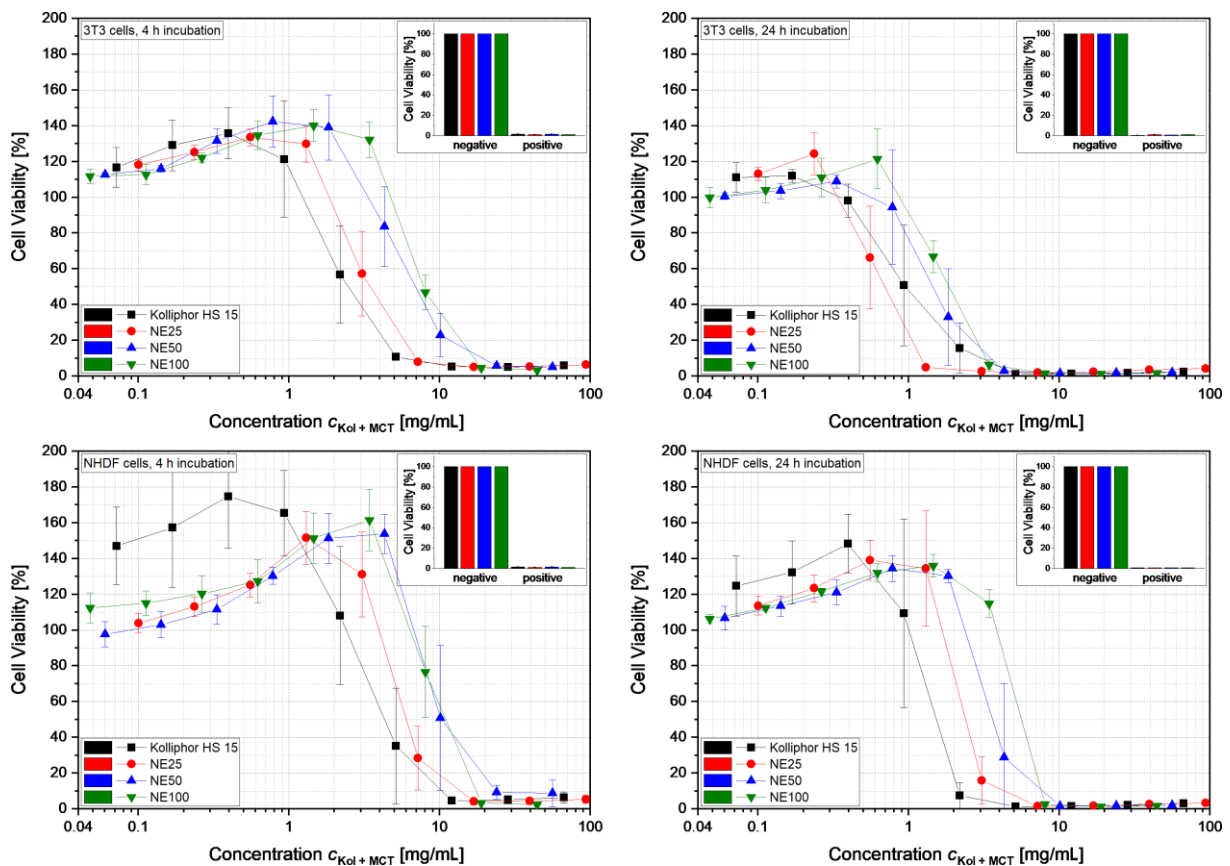

**Figure S2:** Viability of the cell of lines 3T3 and NHDF as a function of the concentration (Kolliphor HS 15 + MCT) of the nanoemulsions NE25, NE50 and NE100 as well as the concentration of an aqueous Kolliphor HS 15 solution ( $n = 3$ ).
